# Supplementary material for: Identification of Diosmin and Flavin Adenine Dinucleotide as Repurposing Treatments for Monkeypox Virus: A Computational Study
Source: MDPI journal article supplement (doi:10.3390/ijms231911570), 2022-09-30
Supplement: s1 [file s1]

# Identification of Diosmin and Flavin Adenine Dinucleotide as Repurposing Treatments for Monkeypox Virus: A Computational Study

Thua-Phong Lam <sup>1,†</sup>, Viet-Hung Tran <sup>2,\*,†</sup>, Tan Thanh Mai <sup>1</sup>, Nghia Vo-Trong Lai <sup>1</sup>, Bao-Tran Ngoc Dang <sup>1</sup>, Minh-Tri Le <sup>1,3</sup>, Thanh-Dao Tran <sup>1</sup>, Dieu-Thuong Thi Trinh <sup>4</sup> and Khac-Minh Thai <sup>1,\*</sup>

<sup>1</sup> Department of Medicinal Chemistry, Faculty of Pharmacy, University of Medicine and Pharmacy at Ho Chi Minh City, Ho Chi Minh City 700000, Vietnam

<sup>2</sup> Institute of Drug Quality Control Ho Chi Minh City, Ho Chi Minh City 700000, Vietnam

<sup>3</sup> School of Medicine, Vietnam National University, Ho Chi Minh City 700000, Vietnam

<sup>4</sup> Faculty of Traditional Medicine, University of Medicine and Pharmacy at Ho Chi Minh City, Ho Chi Minh City 700000, Vietnam

\* Correspondence: tran.viethung168@gmail.com (V.-H.T.); thaikhacminh@ump.edu.vn (K.-M.T.)

† These authors contributed equally to this work.

**Figure S1.** Ramachandran plot of the first domain of the MPXV E8 protein (residues 1–235) ..... 2

**Figure S2.** Protein RMSD plots (carbon backbone) of 11 complexes of the MPXV E8 protein with the top 11 small-molecule drugs during the 100 nanoseconds molecular dynamics simulations ..... 4

**Figure S3.** RMSD plots of ligand heavy atoms in 11 complexes with the MPXV E8 protein during the 100 nanoseconds molecular dynamics simulations ..... 6

## Abbreviations:

CS-E: chondroitin sulfate-E

MPXV: monkeypox virus

RMSD: Root mean square deviation

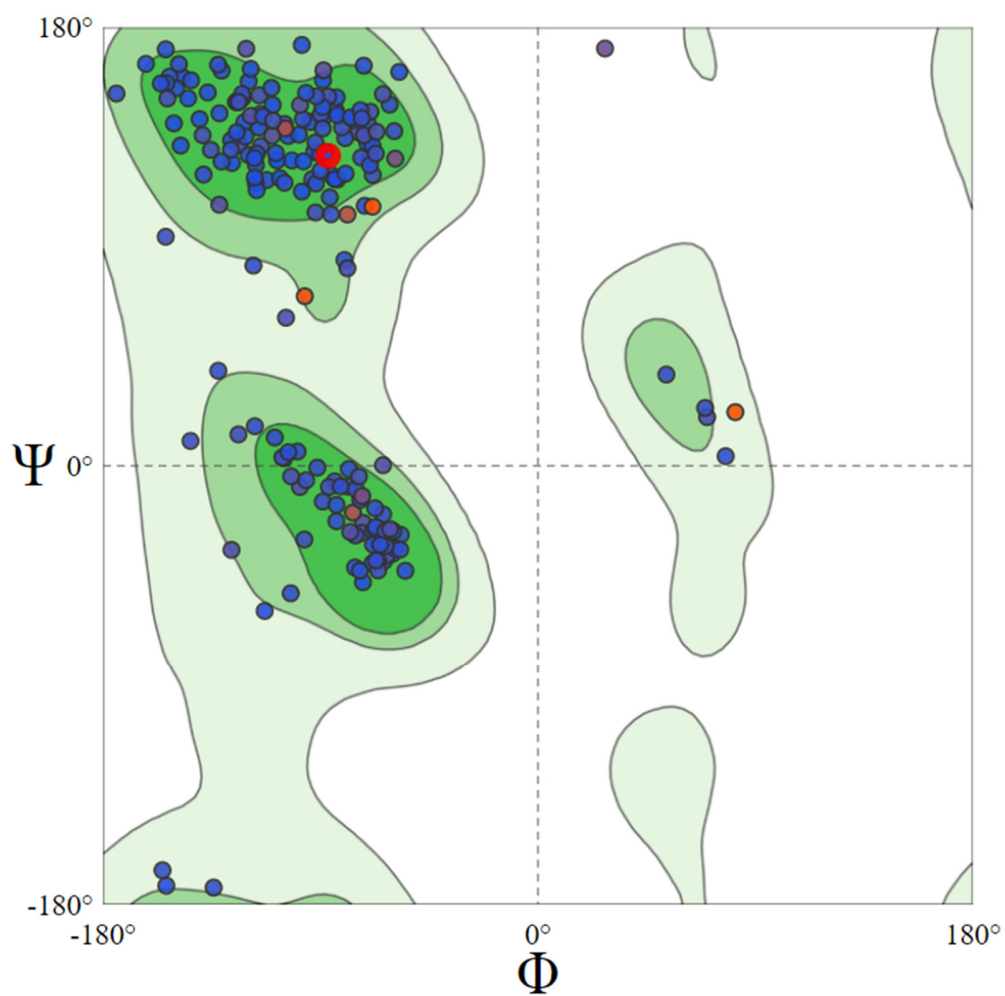

**Figure S1.** Ramachandran plot of the MPXV E8 protein first domain (residue 1–235)

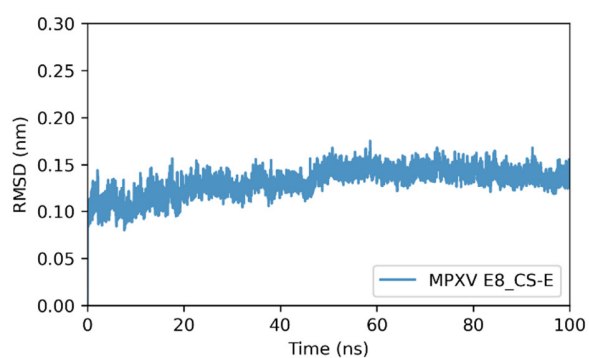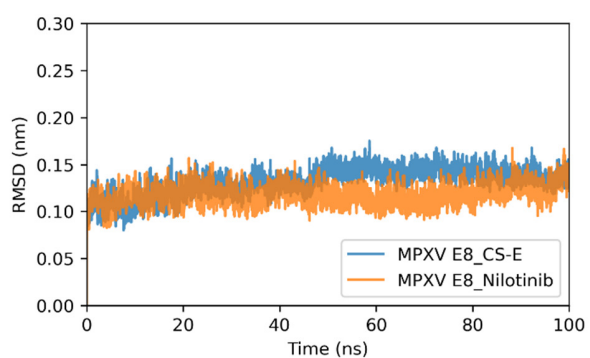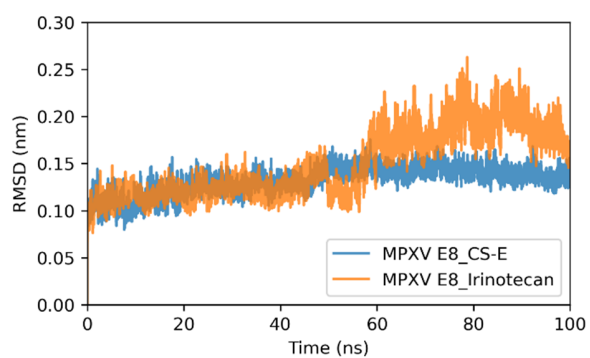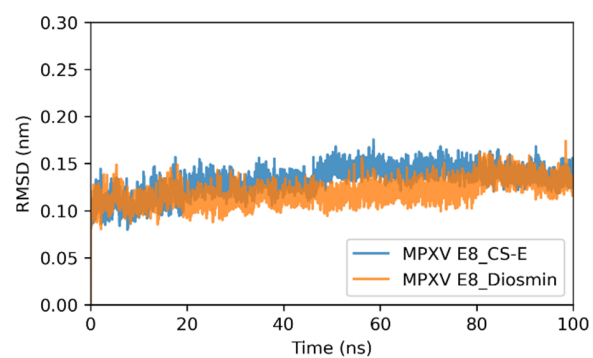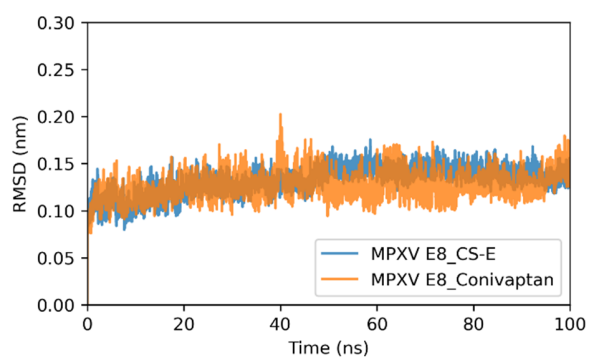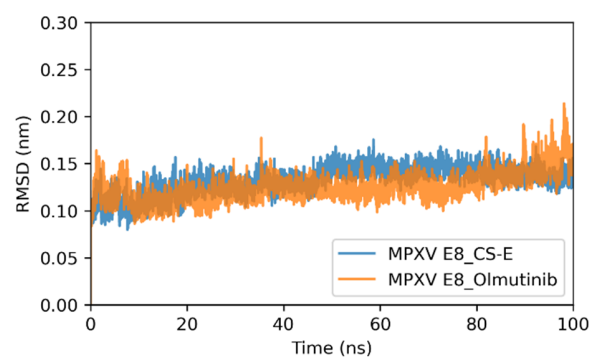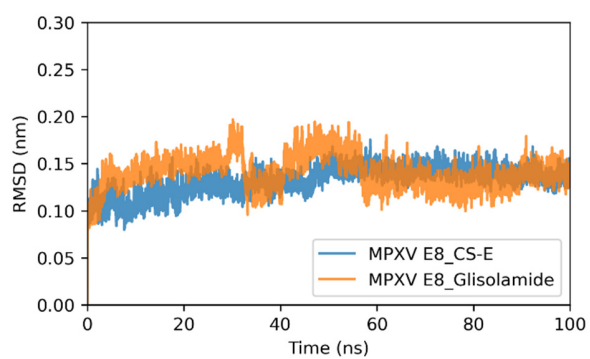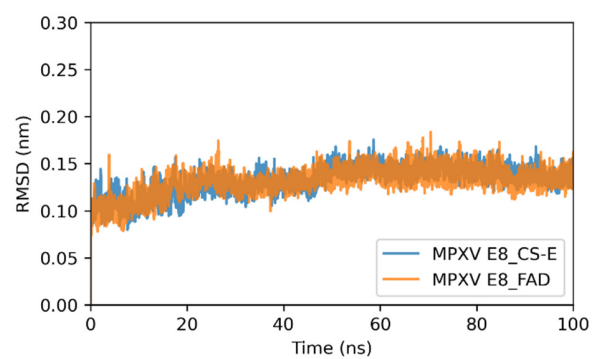

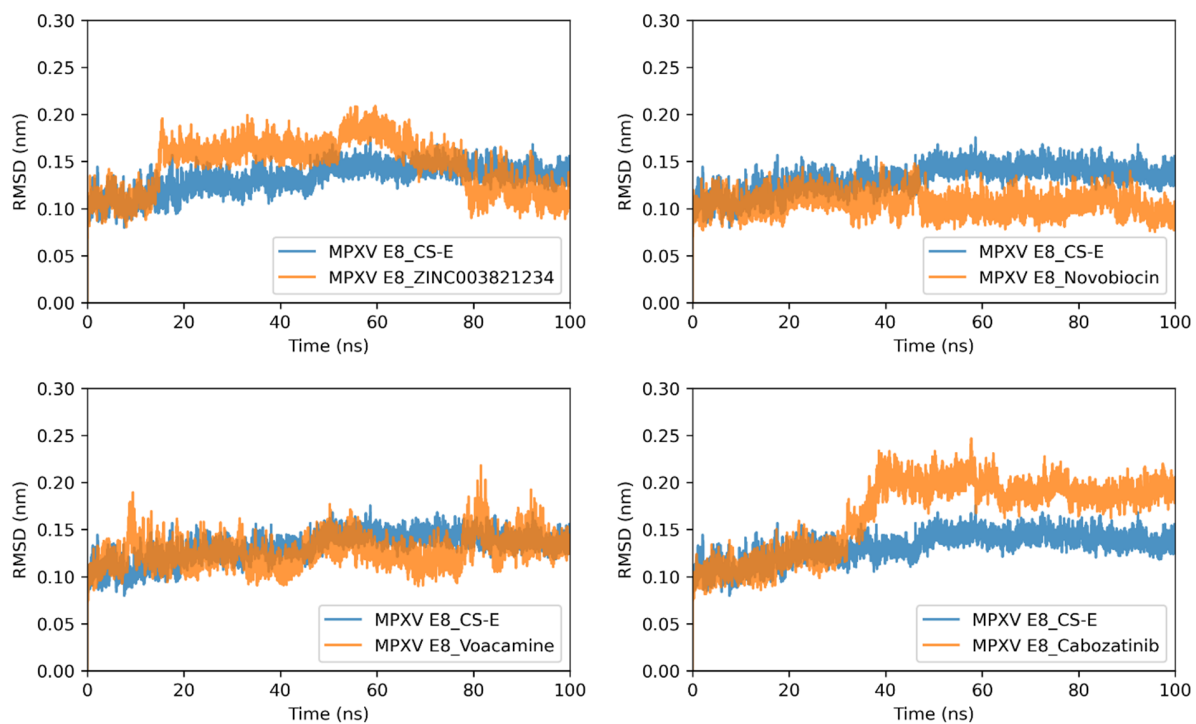

**Figure S2.** Protein RMSD plot (carbon backbone) of 11 complexes of the MPXV E8 protein with the top 11 small-molecule drugs during the 100 nanoseconds molecular dynamics simulations

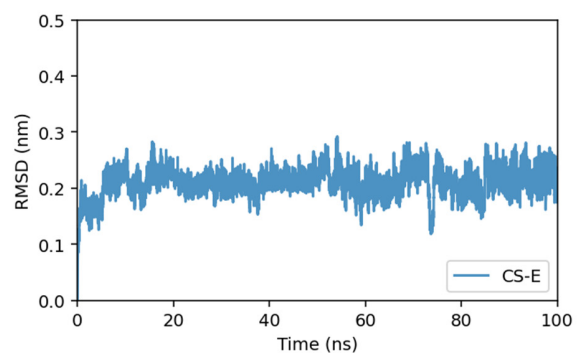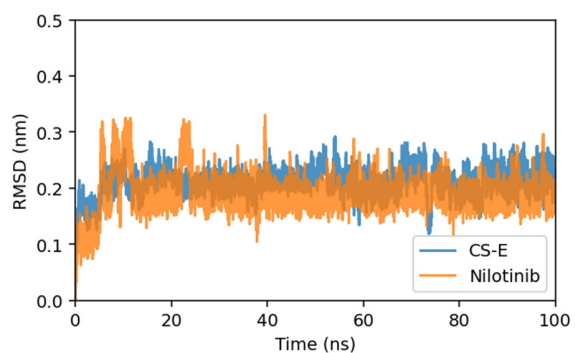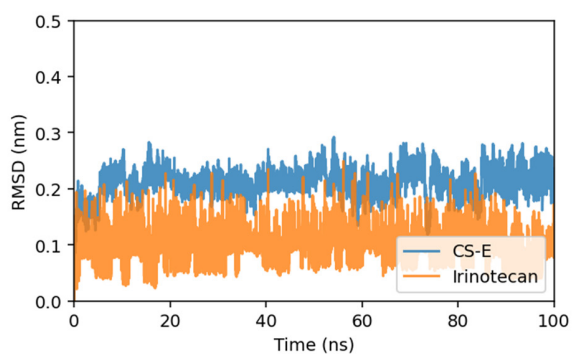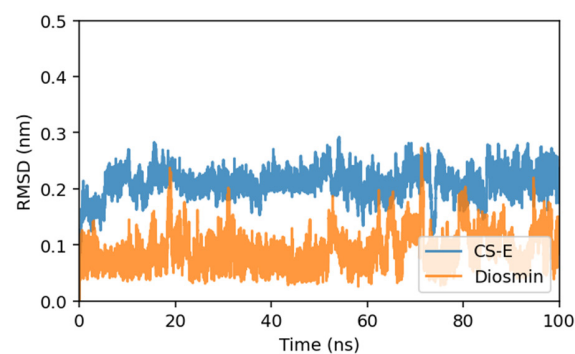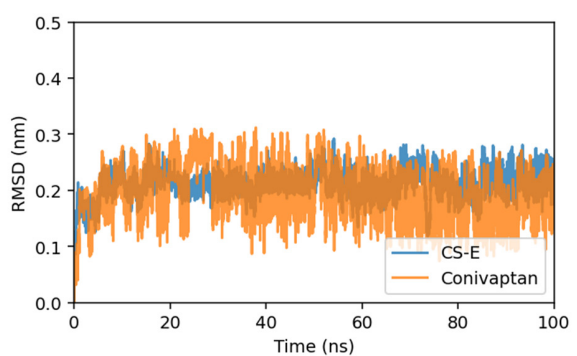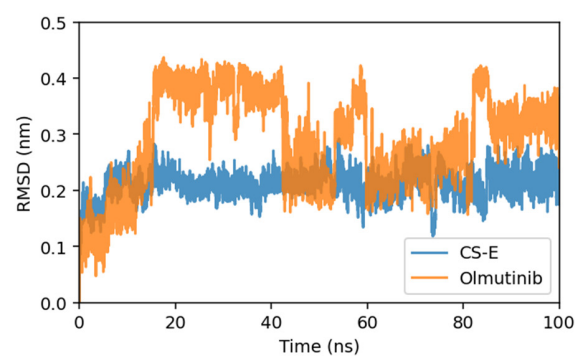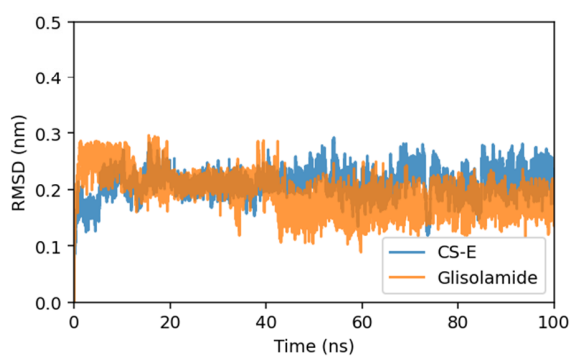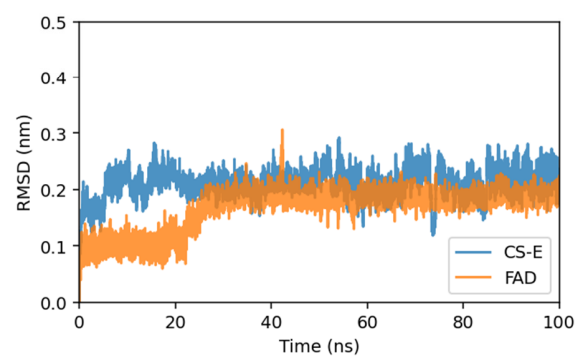

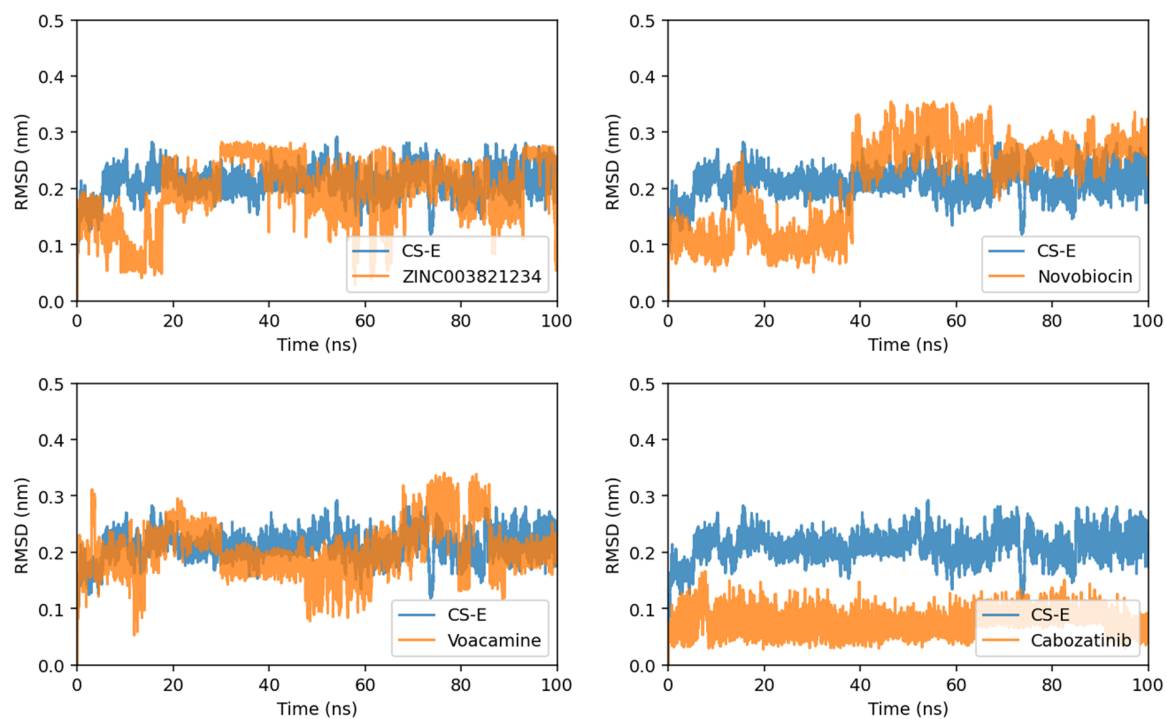

**Figure S3.** RMSD plot of ligand heavy atoms in 11 complexes with the MPXV E8 protein during the 100 nanoseconds molecular dynamics simulations
